# Supplementary material for: Influence of High Temperature Synthesis on the Structure of Graphitic Carbon Nitride and Its Hydrogen Generation Ability
Source: PubMed Central journal article supplement (PMC7344968; doi:10.3390/ma13122756), 2020-06-17
Supplement: materials-13-02756-s001.pdf [file materials-13-02756-s001.pdf]

Supplementary materials

# The influence of high temperature synthesis on the structure of graphitic carbon nitride and its hydrogen generation ability

Table S1. Digital photos of g-C<sub>3</sub>N<sub>4</sub> samples.

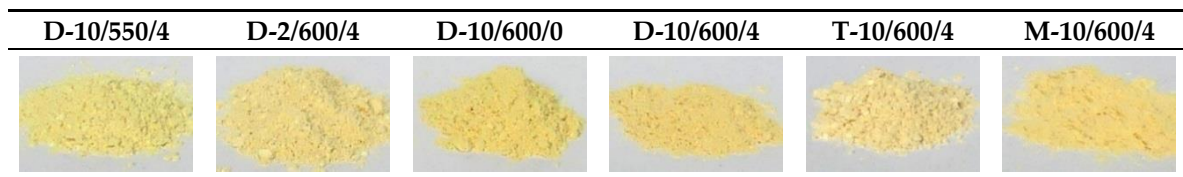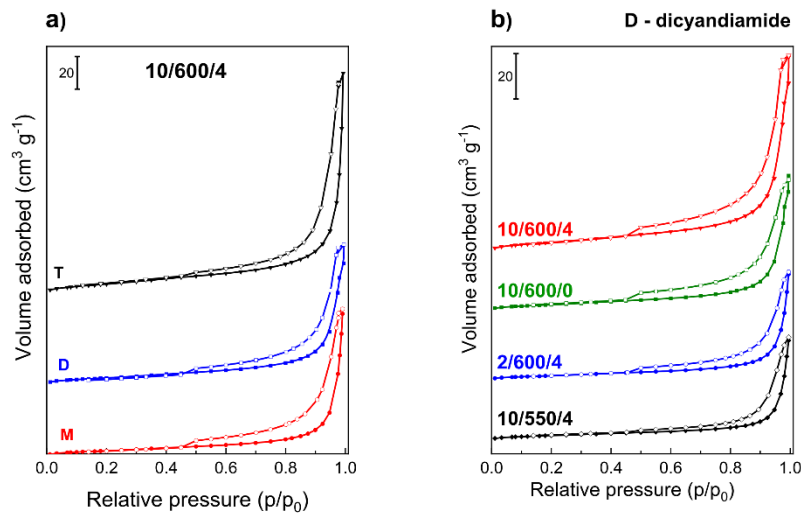

**Figure S1.** Low temperature nitrogen adsorption/desorption isotherms for carbon nitrides obtained from various precursors under conditions of 10/600/4 (a) and the influence of synthesis conditions on nitrogen adsorption/desorption isotherms for carbon nitrides synthesized from dicyandiamide (b).

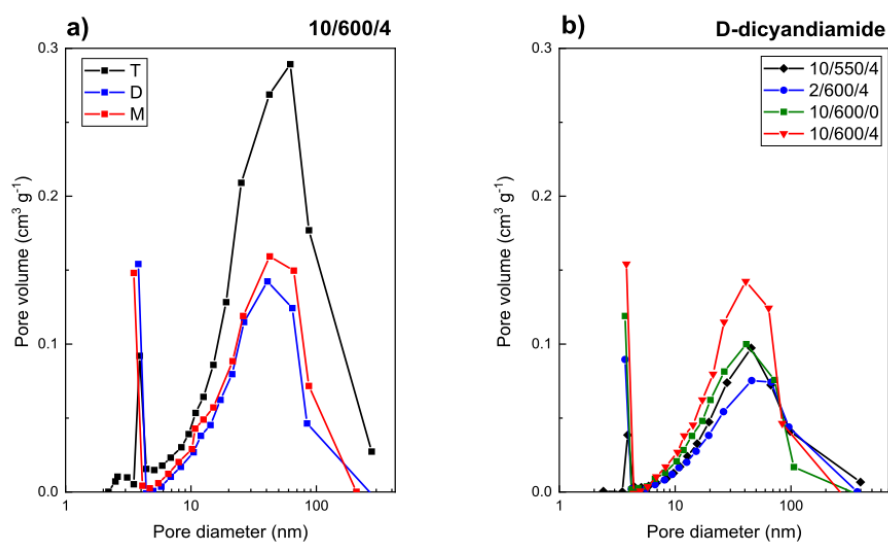

**Figure S2.** Pore distribution for carbon nitrides obtained from various precursors under conditions of 10/600/4 (a) and the influence of synthesis conditions on the pore distribution for carbon nitride condensed from dicyandiamide (b).

**Table S2.** The crystallite sizes and interlayer distances of different g-C<sub>3</sub>N<sub>4</sub> samples.

| Synthesis conditions | Precursor | 2 $\theta$<br>(deg.) | FWHM | Distance<br>( $d_{hkl}$ , Å) |
|----------------------|-----------|----------------------|------|------------------------------|
| 10/550/4             | D         | 27.54                | 1.79 | 3.24                         |
| 2/600/4              | D         | 27.50                | 2.19 | 3.24                         |
| 10/600/0             | D         | 27.65                | 1.83 | 3.22                         |
| -                    | D         | 27.74                | 1.63 | 3.21                         |
| 10/600/4             | T         | 27.62                | 2.12 | 3.23                         |
| -                    | M         | 27.76                | 1.59 | 3.21                         |

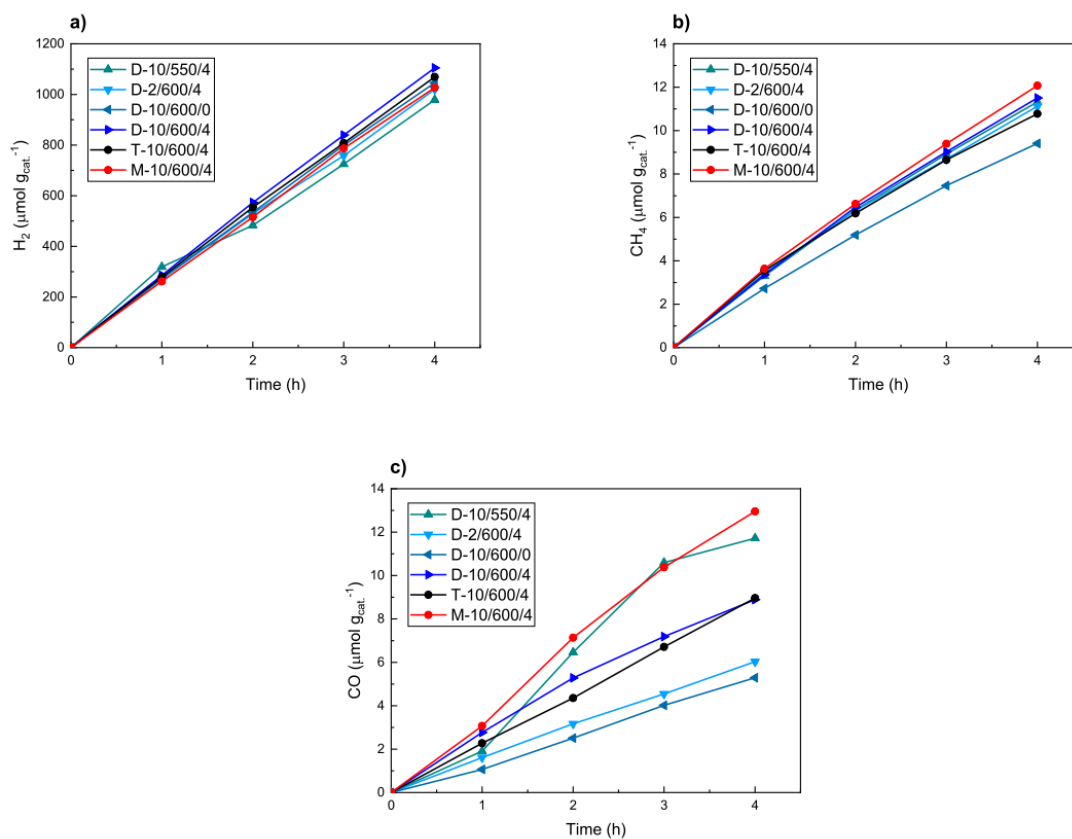

**Figure S3.** Dependence of hydrogen (a), methane (b) and carbon monoxide (c) on time in photocatalytic decomposition of water-methanol solution on different carbon nitrides photocatalysts.

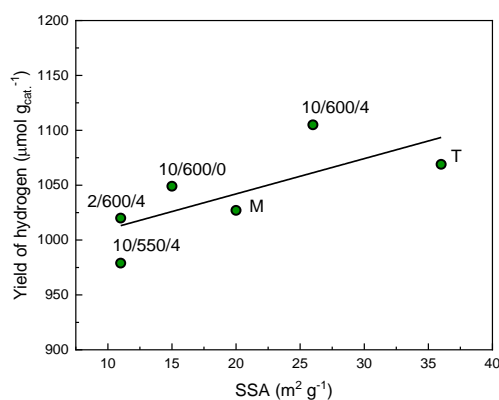

**Figure S4.** Correlation between the yield of hydrogen in the water-methanol photocatalytic oxidation under inert atmosphere and specific surface area.

### Quantum Yields Calculations:

Quantum Yield (QY) can be used to estimate the efficiency of reactors for formation of products' yields. QY shows the number of times a reaction occurs per photon absorbed by the system during irradiation process. The amount of incident photons can be estimated by an intensity meter. Nevertheless, that it is difficult to determine the exact measure of photons absorbed by a photocatalyst due to the scattering. For that reason, the acquired quantum yield is an apparent quantum yield (AQY). The AQY can be described as 2 electrons used for production of hydrogen, as presented in Equation(1) [1]:

$$AQY = \frac{\text{Product yields } (\mu\text{mol/s}) \times \text{no of electrons}}{\text{Photon flux } (\mu\text{mol/s})} \times 100 \quad (1)$$

Where, both, yields of products and photon intensity are in  $\mu\text{mol}$ . Photon intensity can be calculated according to the Equation(2).

$$\text{Photon flux } (\mu\text{mol/s}) = \frac{\text{Intensity of light} \times \text{Wavelength}}{\text{Planck constant} \times \text{Photon density}} \times \frac{\text{Incident area}}{\text{Avogadro's constant}} \quad (2)$$

The intensity of lamp is represented in  $\text{Wm}^{-2}$ , light wavelength is in meters (m) and reactor incident area is calculated in  $\text{m}^2$ . Planck's constant, Photondensity and Avogadro's number are constants of Equation 2 with values  $6.63 \times 10^{-34}$  Js,  $3 \times 10^8$   $\text{ms}^{-1}$  and  $6.63 \times 10^{23}$   $\text{mol}^{-1}$ , respectively.

Apparent quantum yields for each photocatalyst are shown in table S3. All the parameter needed for the calculation are shown in Table S4.

**Table S3.** Calculated apparent quantum yields for each photocatalyst.

| Photocatalyst | Products Rate After 4 h<br>( $\mu\text{mol s}^{-1}$ ) | Stability/Recyclability<br>(%) | Apparent Quantum<br>Yield (%) |
|---------------|-------------------------------------------------------|--------------------------------|-------------------------------|
| 10/600/4/D    | $7.674 \times 10^{-3}$                                | >95                            | 3.457                         |
| 10/600/0/D    | $7.285 \times 10^{-3}$                                | >95                            | 3.282                         |
| 2/600/4/D     | $7.083 \times 10^{-3}$                                | >95                            | 3.191                         |
| 10/550/4/D    | $6.799 \times 10^{-3}$                                | >95                            | 3.063                         |

**Table S4.** Parameters used for calculation of quantum yields.

| Parameter        | Cylindrical Batch Reactor                               |
|------------------|---------------------------------------------------------|
| Light source     | 8 W Hg lamp                                             |
| Wavelength       | $254 \times 10^{-9}$ m                                  |
| Lamp intensity   | $1.2 \text{ W m}^{-3} (\text{J s}^{-1} \text{ m}^{-2})$ |
| Reactor diameter | 0.076 m                                                 |
| Reactor height   | 0.06 m                                                  |
| Incident area    | $1.9 \times 10^{-2} \text{ m}^2$                        |

### Example of Calculation:

$$\text{Photon flux } (\mu\text{mol}) = \frac{\text{Intensity of light} \times \text{Wavelength}}{\text{Planck constant} \times \text{Photon density}} \times \frac{\text{Incident area}}{\text{Avogadro's constant}} \quad (2)$$

$$\text{Photon flux } (\mu\text{mol}) = \frac{12.13 \times 254 \times 10^{-9}}{6.63 \times 10^{-34} \times 3 \times 10^8} \times \frac{19 \times 10^{-3}}{6.63 \times 10^{23}} = 4.439 \times 10^{-7} \text{ mol/s} = 0.4439 \mu\text{mol/s}$$

$$AQY = \frac{\text{Product yields } (\mu\text{mol}) \times \text{no of electrons}}{\text{Photon flux } (\mu\text{mol})} \times 100 \quad (1)$$

$$AQY = \frac{7.674 \times 10^{-3} \times 2}{0.4439} \times 100 = 3.457 \%$$

**Table S5.** Comparison of synthesis efficiency (Yield), specific surface area (SSA) and energy gap (BG) of carbon nitrides.

| No. | Prep. cond. | Yield (%) |      |      |      | BET (m <sup>2</sup> g <sup>-1</sup> ) |      |      |      | Band gap (eV) |      |      |      | Reference |
|-----|-------------|-----------|------|------|------|---------------------------------------|------|------|------|---------------|------|------|------|-----------|
|     |             | U         | T    | D    | M    | U                                     | T    | D    | M    | U             | T    | D    | M    |           |
| 1   | 10/550/4    | -         | -    | 61   | -    | -                                     | -    | 11   | -    | -             | -    | 2.79 | -    | our       |
| 2   | 2/600/4     | -         | -    | 54   | -    | -                                     | -    | 11   | -    | -             | -    | 2.78 | -    | our       |
| 3   | 10/600/0    | -         | -    | 64   | -    | -                                     | -    | 15   | -    | -             | -    | 2.76 | -    | our       |
| 4   | 10/600/4    | -         | 11   | 53   | 26   | -                                     | 36   | 26   | 20   | -             | 2.75 | 2.72 | 2.72 | our       |
| 5   | 2/550/2     | 5         | -    | -    | 69   | 48.1                                  | -    | -    | 15.4 | -             | -    | -    | -    | [2]       |
| 6   | 2/600/2     | 4.3       | -    | -    | 56   | 56.8                                  | -    | -    | 21.8 | -             | -    | -    | -    | [2]       |
| 7   | -/550/2     | -         | -    | -    | -    | 58                                    | 18   | 10   | -    | 2.66          | 2.58 | 2.75 | -    | [3]       |
| 8   | -/600/2     | -         | -    | -    | -    | 77                                    | 27   | -    | -    | 2.67          | 2.62 | -    | -    | [3]       |
| 9   | 5/550/3     | -         | -    | -    | -    | -                                     | -    | 18   | -    | -             | -    | 2.68 | 2.60 | [4]       |
| 10  | 5/590/3     | -         | -    | -    | -    | -                                     | -    | 30.6 | 32.6 | -             | -    | 2.59 | -    | [4]       |
| 11  | 5/600/3     | -         | -    | -    | -    | -                                     | -    | -    | 50.7 | -             | -    | -    | 2.32 | [4]       |
| 12  | 5/550/2     | 1.1       | 9.5  | -    | 51.8 | 40                                    | 12   | -    | 37   | 2.76          | 2.70 | -    | 2.70 | [5]       |
| 13  | 10/550/3    | 1.0       | 12.2 | 31.1 | 44.3 | 153                                   | 23   | 18   | 14   | 2.88          | 2.51 | 2.58 | 2.56 | [6]       |
| 14  | 10/550/2    | -         | -    | -    | -    | 55.1                                  | 13.1 | -    | 11.2 | 2.69          | 2.61 | -    | 2.58 | [7]       |
| 15  | 10/520/4    | -         | -    | -    | -    | 33                                    | 7.5  | 8.7  | -    | 2.87          | 2.75 | 2.80 | -    | [8]       |
| 16  | -/550/3     | -         | -    | -    | -    | 69.6                                  | 11.3 | 12.3 | -    | 2.73          | 2.60 | 2.66 | -    | [9]       |

## Reference

1. Azam, M.U.; Tahir, M.; Umer, M.; Jaffar, M.M.; Nawawi, M.G.M. Engineering approach to enhance photocatalytic water splitting for dynamic H<sub>2</sub> production using La<sub>2</sub>O<sub>3</sub>/TiO<sub>2</sub> nanocatalyst in a monolith photoreactor. *Appl. Surf. Sci.* **2019**, *484*, 1089–1101. doi:10.1016/j.apsusc.2019.04.030.
2. Zheng, Y.; Zhang, Z.S.; Li, C.H. A comparison of graphitic carbon nitrides synthesized from different precursors through pyrolysis. *J. Photochem. Photobiol. A-Chem.* **2017**, *332*, 32–44. doi:10.1016/j.jphotochem.2016.08.005.
3. Zhang, G.G.; Zhang, J.S.; Zhang, M.W.; Wang, X.C. Polycondensation of thiourea into carbon nitride semiconductors as visible light photocatalysts. *J. Mater. Chem.* **2012**, *22*, 8083–8091. doi:10.1039/c2jm00097k.
4. Zhao, Z.H.; Ma, Y.; Fan, J.M.; Xue, Y.Q.; Chang, H.H.; Masubuchi, Y.; Yin, S. Synthesis of graphitic carbon nitride from different precursors by fractional thermal polymerization method and their visible light induced photocatalytic activities. *J. Alloys Compd.* **2018**, *735*, 1297–1305. doi:10.1016/j.jallcom.2017.11.033.
5. Zhu, B.C.; Xia, P.F.; Ho, W.K.; Yu, J.G. Isoelectric point and adsorption activity of porous g-C<sub>3</sub>N<sub>4</sub>. *Appl. Surf. Sci.* **2015**, *344*, 188–195. doi:10.1016/j.apsusc.2015.03.086.
6. Zhang, W.D.; Zhang, Q.; Dong, F.; Zhao, Z.W. The multiple effects of precursors on the properties of polymeric carbon nitride. *Int. J. Photoenergy* **2013**, *2013*, doi:10.1155/2013/685038.
7. Devthade, V.; Kulhari, D.; Umare, S.S. Role of precursors on photocatalytic behavior of graphitic carbon nitride. *Mater. Today-Proc.* **2018**, *5*, 9203–9210.
8. Ismael, M.; Wu, Y.; Taffa, D.H.; Bottke, P.; Wark, M. Graphitic carbon nitride synthesized by simple pyrolysis: role of precursor in photocatalytic hydrogen production. *New J. Chem.* **2019**, *43*, 6909–6920. doi:10.1039/c9nj00859d.
9. Zhang, Y.W.; Liu, J.H.; Wu, G.; Chen, W. Porous graphitic carbon nitride synthesized via direct polymerization of urea for efficient sunlight-driven photocatalytic hydrogen production. *Nanoscale* **2012**, *4*, 5300–5303. doi:10.1039/c2nr30948c.

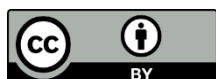

© 2020 by the authors. Submitted for possible open access publication under the terms and conditions of the Creative Commons Attribution (CC BY) license (<http://creativecommons.org/licenses/by/4.0/>).
